# Supplementary material for: Pulsed Electric Fields to Improve the Use of Non-Saccharomyces Starters in Red Wines
Source: MDPI journal article supplement (doi:10.3390/foods10071472), 2021-06-25
Supplement: s1 [file s1]

# Supplementary Materials

**Table S1.** Results of the sensory analysis of the wines. Values are means  $\pm$  sd (n=3). Values with the same letter or without \* in the same column are not significantly different (p<0.05).

| <i>Yeasts/<br/>Parameters</i> | <b>Colour<br/>intensity</b>      | <b>Hue</b>                   | <b>Turbidity</b>            | <b>Aromatic<br/>intensity</b> | <b>Aromatic<br/>quality</b> | <b>Herbaceous</b>           | <b>Floral</b>               | <b>Fruity</b>                     | <b>Reduction</b>            | <b>Oxidation</b>            | <b>Body</b>                 | <b>Sweetness</b>                 | <b>Acidity</b>                   | <b>Global<br/>perception</b> |
|-------------------------------|----------------------------------|------------------------------|-----------------------------|-------------------------------|-----------------------------|-----------------------------|-----------------------------|-----------------------------------|-----------------------------|-----------------------------|-----------------------------|----------------------------------|----------------------------------|------------------------------|
| Sc<br>Untreated               | 3.56 $\pm$ 0.73<br>$\beta$       | 2.33 $\pm$ 0.50<br>$\alpha$  | 1.33 $\pm$ 0.50<br>$\alpha$ | 3.22 $\pm$ 0.67<br>$\alpha$   | 2.56 $\pm$ 0.88<br>$\alpha$ | 1.78 $\pm$ 0.83<br>$\alpha$ | 1.67 $\pm$ 1.12<br>$\alpha$ | 2.56 $\pm$ 1.01<br>$\alpha\beta$  | 1.67 $\pm$ 1.12 $\alpha$    | 2.44 $\pm$ 1.13<br>$\beta$  | 2.89 $\pm$ 0.60<br>$\alpha$ | 1.67 $\pm$ 0.71<br>$\alpha$      | 3.00 $\pm$ 1.00<br>$\beta\gamma$ | 2.56 $\pm$ 1.01<br>$\alpha$  |
| Lt<br>Untreated               | 3.22 $\pm$ 0.97<br>$\alpha$      | 2.44 $\pm$ 0.53<br>$\alpha$  | 1.33 $\pm$ 0.50<br>$\alpha$ | 3.00 $\pm$ 0.71<br>$\alpha$   | 3.11 $\pm$ 0.93<br>$\alpha$ | 1.44 $\pm$ 0.53<br>$\alpha$ | 1.89 $\pm$ 0.93<br>$\alpha$ | 2.67 $\pm$ 1.00 $\beta$           | 1.22 $\pm$ 0.44 $\alpha$    | 1.78 $\pm$ 1.09<br>$\alpha$ | 2.44 $\pm$ 0.73<br>$\alpha$ | 1.89 $\pm$ 1.05<br>$\alpha\beta$ | 3.56 $\pm$ 0.88<br>$\gamma$      | 2.89 $\pm$ 1.05<br>$\alpha$  |
| Hv<br>Untreated               | 3.11 $\pm$ 0.78<br>$\alpha\beta$ | 2.78 $\pm$ 0.97<br>$\alpha$  | 1.56 $\pm$ 0.73<br>$\alpha$ | 3.22 $\pm$ 0.67<br>$\alpha$   | 3.00 $\pm$ 0.71<br>$\alpha$ | 1.56 $\pm$ 0.73<br>$\alpha$ | 1.67 $\pm$ 0.87<br>$\alpha$ | 2.00 $\pm$ 0.50<br>$\alpha\beta$  | 1.78 $\pm$ 0.97 $\alpha$    | 1.56 $\pm$ 0.73<br>$\alpha$ | 2.67 $\pm$ 0.87<br>$\alpha$ | 2.00 $\pm$ 1.00<br>$\beta$       | 2.78 $\pm$ 0.83<br>$\alpha\beta$ | 2.78 $\pm$ 0.67<br>$\alpha$  |
| Td<br>Untreated               | 3.11 $\pm$ 0.78<br>$\alpha$      | 2.22 $\pm$ 1.09<br>$\alpha$  | 1.33 $\pm$ 0.50<br>$\alpha$ | 2.56 $\pm$ 0.73<br>$\alpha$   | 3.11 $\pm$ 0.78<br>$\alpha$ | 1.56 $\pm$ 0.73<br>$\alpha$ | 2.33 $\pm$ 0.87<br>$\alpha$ | 2.33 $\pm$ 1.22<br>$\alpha\beta$  | 1.33 $\pm$ 0.71 $\alpha$    | 1.78 $\pm$ 0.83<br>$\alpha$ | 2.56 $\pm$ 0.53<br>$\alpha$ | 1.56 $\pm$ 0.73<br>$\alpha$      | 3.00 $\pm$ 0.71<br>$\alpha\beta$ | 2.67 $\pm$ 0.87<br>$\alpha$  |
| Mp<br>Untreated               | 3.11 $\pm$ 0.78<br>$\alpha$      | 2.11 $\pm$ 0.78<br>$\alpha$  | 1.22 $\pm$ 0.44<br>$\alpha$ | 2.78 $\pm$ 0.83<br>$\alpha$   | 2.67 $\pm$ 0.71<br>$\alpha$ | 1.44 $\pm$ 0.53<br>$\alpha$ | 1.89 $\pm$ 1.05<br>$\alpha$ | 1.67 $\pm$ 0.87 $\alpha$          | 1.22 $\pm$ 0.67 $\alpha$    | 1.56 $\pm$ 0.73<br>$\alpha$ | 2.22 $\pm$ 0.83<br>$\alpha$ | 1.67 $\pm$ 0.87<br>$\alpha$      | 2.89 $\pm$ 1.27<br>$\alpha\beta$ | 2.22 $\pm$ 0.67<br>$\alpha$  |
| Sp<br>Untreated               | 3.11 $\pm$ 0.78<br>$\alpha\beta$ | 2.56 $\pm$ 0.73*<br>$\alpha$ | 1.33 $\pm$ 0.71<br>$\alpha$ | 2.78 $\pm$ 0.83<br>$\alpha$   | 2.56 $\pm$ 0.73<br>$\alpha$ | 1.56 $\pm$ 0.88<br>$\alpha$ | 1.78 $\pm$ 0.67<br>$\alpha$ | 2.00 $\pm$ 0.71*<br>$\alpha\beta$ | 1.56 $\pm$ 1.01 $\alpha$    | 1.44 $\pm$ 0.73<br>$\alpha$ | 2.56 $\pm$ 0.88<br>$\alpha$ | 1.67 $\pm$ 0.87<br>$\alpha$      | 2.56 $\pm$ 1.33<br>$\alpha$      | 2.44 $\pm$ 0.53<br>$\alpha$  |
| Sc PEF                        | 4.00 $\pm$ 0.71<br>$\beta$       | 2.78 $\pm$ 0.83<br>$\alpha$  | 1.33 $\pm$ 0.50<br>$\alpha$ | 3.00 $\pm$ 0.50<br>$\alpha$   | 3.11 $\pm$ 0.60<br>$\alpha$ | 1.67 $\pm$ 1.00<br>$\alpha$ | 1.56 $\pm$ 1.01<br>$\alpha$ | 2.56 $\pm$ 0.88<br>$\alpha\beta$  | 1.56 $\pm$ 1.01 $\alpha$    | 2.22 $\pm$ 0.83<br>$\beta$  | 2.67 $\pm$ 0.71<br>$\alpha$ | 1.44 $\pm$ 0.73<br>$\alpha$      | 3.44 $\pm$ 1.13<br>$\beta\gamma$ | 3.00 $\pm$ 0.50<br>$\alpha$  |
| Lt PEF                        | 3.22 $\pm$ 0.83<br>$\alpha$      | 2.11 $\pm$ 0.78<br>$\alpha$  | 1.33 $\pm$ 0.50<br>$\alpha$ | 2.78 $\pm$ 0.83<br>$\alpha$   | 3.33 $\pm$ 0.87<br>$\alpha$ | 1.56 $\pm$ 1.13<br>$\alpha$ | 1.89 $\pm$ 0.93<br>$\alpha$ | 2.78 $\pm$ 0.67 $\beta$           | 1.44 $\pm$ 0.73 $\alpha$    | 1.67 $\pm$ 0.87<br>$\alpha$ | 2.67 $\pm$ 0.87<br>$\alpha$ | 2.00 $\pm$ 1.12<br>$\alpha\beta$ | 4.00 $\pm$ 0.50<br>$\gamma$      | 3.00 $\pm$ 1.00<br>$\alpha$  |
| Hv PEF                        | 3.22 $\pm$ 0.88<br>$\alpha\beta$ | 2.44 $\pm$ 0.88<br>$\alpha$  | 1.33 $\pm$ 1.09<br>$\alpha$ | 3.00 $\pm$ 0.71<br>$\alpha$   | 3.11 $\pm$ 0.97<br>$\alpha$ | 1.44 $\pm$ 0.88<br>$\alpha$ | 2.00 $\pm$ 0.71<br>$\alpha$ | 2.78 $\pm$ 0.87<br>$\alpha\beta$  | 1.33 $\pm$ 0.88 $\alpha$    | 1.78 $\pm$ 0.88<br>$\alpha$ | 2.44 $\pm$ 0.67<br>$\alpha$ | 1.78 $\pm$ 0.93<br>$\beta$       | 3.33 $\pm$ 0.67<br>$\alpha\beta$ | 2.89 $\pm$ 1.22<br>$\alpha$  |
| Td PEF                        | 3.33 $\pm$ 0.87<br>$\alpha$      | 2.44 $\pm$ 0.73<br>$\alpha$  | 1.78 $\pm$ 0.97<br>$\alpha$ | 2.78 $\pm$ 0.83<br>$\alpha$   | 2.67 $\pm$ 0.71<br>$\alpha$ | 1.67 $\pm$ 1.00<br>$\alpha$ | 1.78 $\pm$ 0.67<br>$\alpha$ | 2.11 $\pm$ 0.78<br>$\alpha\beta$  | 1.56 $\pm$ 0.88 $\alpha$    | 1.56 $\pm$ 0.53<br>$\alpha$ | 2.89 $\pm$ 0.60<br>$\alpha$ | 2.11 $\pm$ 1.05<br>$\alpha$      | 3.00 $\pm$ 0.71<br>$\alpha\beta$ | 2.78 $\pm$ 0.44<br>$\alpha$  |
| Mp PEF                        | 3.22 $\pm$ 0.83<br>$\alpha$      | 2.56 $\pm$ 0.73<br>$\alpha$  | 1.67 $\pm$ 0.87<br>$\alpha$ | 2.89 $\pm$ 0.93<br>$\alpha$   | 2.89 $\pm$ 1.27<br>$\alpha$ | 1.67 $\pm$ 0.87<br>$\alpha$ | 1.89 $\pm$ 1.05<br>$\alpha$ | 2.33 $\pm$ 1.32 $\alpha$          | 1.11 $\pm$ 0.33 $\alpha$    | 1.56 $\pm$ 0.73<br>$\alpha$ | 2.78 $\pm$ 0.67<br>$\alpha$ | 1.78 $\pm$ 0.83<br>$\alpha$      | 3.11 $\pm$ 0.93<br>$\alpha\beta$ | 2.78 $\pm$ 0.44<br>$\alpha$  |
| Sp PEF                        | 3.56 $\pm$ 0.88<br>$\alpha\beta$ | 1.67 $\pm$ 0.87*<br>$\alpha$ | 1.22 $\pm$ 0.44<br>$\alpha$ | 3.33 $\pm$ 1.00<br>$\alpha$   | 3.11 $\pm$ 1.54<br>$\alpha$ | 1.22 $\pm$ 0.44<br>$\alpha$ | 2.22 $\pm$ 1.20<br>$\alpha$ | 3.11 $\pm$ 1.36*<br>$\alpha\beta$ | 1.89 $\pm$ 1.27<br>$\alpha$ | 1.00 $\pm$ 0.00<br>$\alpha$ | 2.44 $\pm$ 0.53<br>$\alpha$ | 2.00 $\pm$ 0.87<br>$\alpha$      | 2.44 $\pm$ 1.13<br>$\alpha$      | 3.22 $\pm$ 1.09<br>$\alpha$  |

PEF treatment: \* = significant difference between counterparts. Fermentative biotechnology: Greek letters.
